# Supplementary material for: An anticlockwise metamorphic P-T path and nappe stacking in the Reisa Nappe Complex in the Scandinavian Caledonides, northern Norway: evidence for weakening of lower continental crust before and during continental collision
Source: Copernicus journal article supplement (doi:10.5194/se-2018-74), 2018-07-31
Supplement: Supplementary file 1 [file S1-S3 supplementary tables (XRF, SIMS, TIMS).xls]

## Sheet: Manuscript information
Supporting information for:
Disemembering of subducted continental crust by nappe-stacking during Scandian continental collision:
an example from the Reisa Nappe Complex, northern Norway
Faber, C.1, Stünitz, H.1, Gasser, D.2,3, Jerabek, P.4, , Kraus, K.1, Corfu, F.5, Ravna, E.K.1, Konopasek, J.1
1Department of Geosciences, UiT The Arctic University of Norway, Tromsø, N-9037, Norway
2Western Norway University of Applied Sciences, Sogndal 6851, Norway
3Geological Survey of Norway, Trondheim 7491, Norway
4IPSG, Faculty of Science, Charles University, Albertov 6, 128 43, Prague 2, Czech Republic
5Department of Geosciences & Centre for Earth Evolution and Dynamics, University of Oslo, Norway
Table S1. XRF bulk composition analyses for petrology samples
Table S2. SIMS U-Th-Pb zircon data for migmatite sample AR23a leucosome and restite and pegmatitic gabbro sample SK18b
Table S3. U-Pb TIMS data for titanite

## Sheet: S1 XRF
Table S1. XRF bulk composition analyses for petrology samples
Sample	UL248	AR71	AR153	AR25b	AR26
Na2O	2.61	0.85	1.68434	1.24	0.92
MgO	0.98	1.29	2.44839	2.76	2.94
Al2O3	13.41	11.1	11.6543	14.5	17.7
SiO2	72.31	76.6	70.9208	66.1	61.2
P2O5	0.1	0.0786	0.147166	0.14	0.2
K2O	3.78	2.27	1.73777	3.69	4.08
CaO	1.75	0.53	3.32433	1.05	0.79
TiO2	0.68	0.97	0.872915	0.99	1
MnO	0.09	0.0482	0.0997905	0.11	0.11
Fe2O3	3.74	4.98	6.20919	7.23	9.17
Cr2O2	0	0	0.0131038	0	0
NiO	0.01	0	0.0100798	0	0.00600072
LOI	0.52	1.32	0.625196	2.13	1.96
Total	99.98	100.037	99.7474	99.94	100.076

## Sheet: S2 SIMS SK18b Zr
Table S2. SIMS U-Th-Pb zircon data
								TW Concordia columns (Pbc corrected)					Ages
Sample	Sample/	[U]	[Th]	[Pb]	Th/U	f206%	206Pb/204Pb	238U	±s	207Pb	±s		207Pb	±s	207Pb	±s	206Pb	±s
name	spot #	ppm	ppm	ppm	calc		measured	206Pb	%	206Pb	%		206Pb		235U		238U
SK18b	n4287_@1	129.634	51.7022	10.8012	0.359836	{0.11}	17723	14.1873	0.587448	0.0569481	1.25597		489.525	27.4703	447.257	5.02839	439.082	2.49398
SK18b	n4287_@02	257.716	168.522	23.0921	0.671821	{0.05}	36455.4	14.074	0.605281	0.0555548	0.896456		434.62	19.8418	441.229	3.87826	442.497	2.58901
SK18b	n4287_@03	351.206	142.054	29.5804	0.413409	{0.02}	118706	14.0261	0.643681	0.0555363	0.76652		433.877	16.9832	442.329	3.59547	443.956	2.76207
SK18b	n4287_@04	327.066	229.133	29.7869	0.670685	{0.03}	55343.3	14.047	0.630292	0.056509	0.789385		472.422	17.3711	448.052	3.66602	443.319	2.70086
SK18b	n4287_@05	111.119	47.0304	9.17924	0.360034	{0.08}	22932.2	14.3606	0.582931	0.057181	1.75893		498.523	38.2809	444.348	6.69057	433.955	2.44686
SK18b	n4287_@06	180.79	73.9877	15.2029	0.435143	{0.03}	64011.2	14.0695	0.58471	0.0551463	1.26791		418.161	28.0721	438.707	4.98601	442.633	2.50175
SK18b	n4287_@07	180.87	68.642	14.9199	0.369331	{0.03}	62515.6	14.2222	0.664777	0.0558526	1.12131		446.513	24.7295	439.396	4.66013	438.039	2.81586
SK18b	n4287_@08	164.477	64.3893	13.6557	0.40046	{0.01}	235444	14.217	0.585105	0.0556397	1.12722		438.02	24.8953	438.166	4.52981	438.194	2.47917
SK18b	n4287_@09	248.721	132.027	21.5157	0.539605	{0.04}	51197.6	14.2002	0.629608	0.0559368	0.913036		449.86	20.1533	440.487	3.97138	438.696	2.67073
SK18b	n4287_@10	399.948	185.287	33.8454	0.452593	0.04	49711	14.1747	0.627532	0.0558794	0.745912		447.581	16.4898	440.762	3.49139	439.458	2.66639
SK18b	n4287_@11	281.057	122.83	23.602	0.439547	{0.03}	68872.5	14.2043	0.597144	0.0556689	0.856569		439.189	18.9492	438.67	3.7262	438.571	2.5323
SK18b	n4287_@12	167.631	69.4486	13.8717	0.402264	{0.02}	92569.2	14.3776	0.588612	0.0562281	1.112		461.388	24.4629	437.912	4.48535	433.46	2.46798
SK18b	n4287_@13	111.21	35.0633	9.06607	0.30695	{0.03}	60237.8	14.1871	0.582988	0.0562058	1.36355		460.508	29.9499	442.535	5.33345	439.087	2.47507
SK18b	n4287_@14	291.347	119.234	24.1122	0.411637	{0.03}	61826.8	14.2878	0.592097	0.0554843	0.839617		431.79	18.6002	435.409	3.64435	436.094	2.49718
SK18b	n4287_@15	114.261	47.7007	9.50873	0.380883	{0.08}	22977	14.2298	0.618374	0.0564671	2.03204		470.782	44.3526	443.122	7.65595	437.814	2.61797
SK18b	n4287_@16	157.146	61.6936	13.025	0.421111	{0.00}	>1e6	14.2366	0.5833	0.0551103	1.41718		416.701	31.3529	434.286	5.4297	437.61	2.46834
SK18b	n4287_@17	305.045	143.415	25.8954	0.495117	{0.00}	>1e6	14.1811	0.610671	0.0552714	0.92005		423.219	20.401	436.705	3.92692	439.268	2.59365
SK18b	n4287_@19	1216.61	881.262	111.3	0.748581	0.03	69938.7	14.0132	0.658551	0.0554836	0.417493		431.764	9.27578	442.32	2.79974	444.351	2.82832
SK18b	n4287_@20	489.11	178.086	40.4492	0.361563	{0.03}	54858.3	14.1578	0.635423	0.0559102	0.642079		448.805	14.2015	441.386	3.2388	439.965	2.70294
AR23a leuco	n5698@1	586.098	84.6862	44.5201	0.149913	0.09	21389.7	14.5179	1.21486	0.0561213	0.870224		457.172	19.306	433.797	5.28939	429.407	5.04872
AR23a leuco	n5698@12	297.259	30.9644	22.6944	0.106828	{0.00}	>1e6	14.2625	1.20591	0.0555862	1.13202		435.88	25.2078	436.689	5.88731	436.843	5.09541
AR23a leuco	n5698@14	302.705	34.4997	22.9378	0.11553	{0.03}	70554.1	14.4055	1.25713	0.0555925	1.27565		436.129	28.4055	433.199	6.33551	432.648	5.26258
AR23a leuco	n5698@16	684.419	80.9977	53.3656	0.120051	{0.00}	>1e6	14.0242	1.22228	0.0561287	0.788187		457.465	17.485	446.197	5.26497	444.015	5.24657
AR23a leuco	n5698@17	478.334	73.0061	37.4649	0.158161	{0.00}	>1e6	14.1098	1.24025	0.0558776	0.942633		447.507	20.9476	442.394	5.60199	441.412	5.29356
AR23a leuco	n5698@17b	373.032	40.668	28.3863	0.111499	{0.00}	>1e6	14.3277	1.23179	0.0555344	1.06272		433.8	23.6728	434.741	5.7697	434.919	5.18264
AR23a leuco	n5698@18	304.239	34.1866	23.4974	0.115658	{0.00}	>1e6	14.1365	1.25491	0.0557785	1.27961		443.562	28.4569	441.081	6.43245	440.606	5.34671
AR23a leuco	n5698@18b	618.457	118.464	48.7281	0.195389	{0.00}	418916	14.1705	1.1794	0.0556007	0.849176		436.461	18.9068	439.084	5.19385	439.585	5.01358
AR23a leuco	n5698@1b	445.977	67.3152	34.6921	0.157822	{0.03}	71675.4	14.2024	1.26176	0.0556092	0.92341		436.799	20.5586	438.337	5.58138	438.63	5.35259
AR23a leuco	n5698@2	301.967	34.9707	22.8403	0.120508	{0.02}	83455.8	14.4509	1.22709	0.055482	1.27252		431.697	28.3576	431.39	6.23213	431.332	5.12166
AR23a leuco	n5698@20	385.236	49.0263	29.6827	0.130394	{0.02}	76217.7	14.2251	1.18434	0.0554023	1.0395		428.493	23.1769	436.444	5.60576	437.953	5.01652
AR23a leuco	n5698@20b	475.831	74.9454	37.5088	0.157187	{0.02}	84835	14.0159	1.21254	0.0558977	1.00821		448.309	22.402	444.922	5.69687	444.268	5.20758
AR23a leuco	n5698@22	520.729	101.475	41.4134	0.19667	{0.02}	79026.7	14.0433	1.20281	0.055572	1.07238		435.31	23.8819	442.122	5.79255	443.431	5.15638
AR23a leuco	n5698@23	1100.43	44.5625	83.3131	0.0400428	{0.01}	125138	14.1166	1.15616	0.0563094	0.68259		464.59	15.1237	444.987	4.84889	441.205	4.93225
AR23a leuco	n5698@24	317.119	48.4527	24.4208	0.15579	{0.00}	>1e6	14.3494	1.21524	0.0565821	1.38054		475.281	30.534	440.85	6.59873	434.283	5.10576
AR23a leuco	n5698@25	321.469	37.5553	25.048	0.112661	{0.00}	>1e6	13.9941	1.19905	0.0552463	1.35844		422.205	30.3228	441.274	6.50553	444.939	5.15716
AR23a leuco	n5698@26	439.19	71.6535	34.3807	0.155971	{0.00}	>1e6	14.1022	1.20109	0.0553179	1.1643		425.094	25.9754	438.987	5.97952	441.641	5.12891
AR23a leuco	n5698@26b	573.866	108.191	45.1687	0.186552	{0.02}	79634.5	14.1457	1.19072	0.0552225	1.04236		421.244	23.2701	437.277	5.63824	440.328	5.07002
AR23a leuco	n5698@2b	298.45	19.3142	22.333	0.0685584	{0.00}	>1e6	14.3872	1.24638	0.0552161	1.1725		420.984	26.1772	431.254	6.03055	433.179	5.22376
AR23a leuco	n5698@3	328.717	27.4979	24.9582	0.0837458	{0.02}	95617.6	14.2444	1.2914	0.0554131	1.3862		428.928	30.9063	436.032	6.73821	437.378	5.46328
AR23a leuco	n5698@32	352.955	30.6565	27.0285	0.0900639	{0.01}	147097	14.1592	1.21888	0.0562546	1.25344		462.431	27.7838	443.553	6.30253	439.922	5.18534
AR23a leuco	n5698@33	553.863	65.7056	43.1707	0.119647	{0.00}	>1e6	14.0282	1.21388	0.0561836	1.00564		459.633	22.301	446.448	5.71025	443.894	5.20912
AR23a leuco	n5698@35	295.844	33.5024	22.8676	0.11327	{0.05}	40963.5	14.1169	1.21493	0.0559097	1.39613		448.785	31.0206	442.419	6.65915	441.197	5.18299
AR23a leuco	n5698@4	327.948	44.6822	25.1712	0.145987	{0.00}	>1e6	14.3547	1.29867	0.0563579	1.08206		466.495	23.9676	439.301	6.04611	434.129	5.45458
AR23a leuco	n5698@4b	721.901	121.211	56.2602	0.16996	{0.00}	>1e6	14.223	1.21167	0.0554714	0.731047		431.272	16.2912	436.938	5.03726	438.014	5.13303
AR23a leuco	n5698@5	463.167	82.0574	36.3836	0.175725	{0.02}	96122.5	14.1288	1.26231	0.0550466	0.919233		414.116	20.5466	436.569	5.55612	440.838	5.38099
AR23a leuco	n5698@6	328.588	42.4418	25.3007	0.13209	{0.05}	39685.3	14.2444	1.33098	0.0556419	1.09511		438.108	24.3762	437.494	6.14487	437.377	5.63077
AR23a rest	n5699@14	215.865	97.2895	84.4963	0.448537	{0.00}	>1e6	3.17216	1.25131	0.112246	0.567608		1836.09	10.2813	1798.61	11.645	1766.46	19.3631
AR23a rest	n5699@2b	345.723	181.812	118.123	0.530473	0.33	5592.47	3.68621	1.21678	0.105396	0.570885		1721.23	10.4886	1622.4	10.9447	1547.3	16.76
AR23a rest	n5699@23	215.344	78.9976	64.1242	0.372731	{0.00}	>1e6	4.05562	1.21072	0.0986704	0.731321		1599.15	13.6478	1493.85	11.1246	1420.77	15.4563
AR23a rest	n5699@24b	590.773	168.558	88.9316	0.356222	0.15	12367.8	8.12852	3.96303	0.121655	2.21193		1980.64	39.39	1136.8	31.5254	747.944	28.0472
AR23a rest	n5699@1b	240.883	73.1727	26.3555	0.30015	1.62	1154.88	10.5282	1.35775	0.0590474	5.55481		568.844	121.12	581.654	25.6411	584.94	7.59682
AR23a rest	n5699@3	329.065	41.2145	26.1155	0.124362	{0.00}	>1e6	13.795	1.20289	0.0561006	1.33998		456.354	29.7338	451.995	6.59022	451.139	5.24331
AR23a rest	n5699@22	436.491	55.6505	34.4512	0.124139	{0.01}	167827	13.8497	1.17172	0.0543334	1.1536		384.893	25.9183	439.026	5.87782	449.418	5.08857
AR23a rest	n5699@11	465.551	70.2992	36.8329	0.139872	{0.00}	>1e6	13.9086	1.17114	0.0569371	1.61424		489.098	35.6195	454.41	7.33248	447.582	5.06595
AR23a rest	n5699@15	478.188	74.7111	37.7058	0.153971	{0.00}	>1e6	13.9857	1.22831	0.0547188	1.07998		400.75	24.1966	438.064	5.83627	445.197	5.28602
AR23a rest	n5699@10	989.888	98.6906	76.8507	0.100403	{0.00}	>1e6	13.9981	1.14859	0.0554604	0.714997		430.83	15.9347	442.555	4.86494	444.814	4.93869
AR23a rest	n5699@6b	394.068	59.7094	31.0099	0.147311	{0.00}	>1e6	13.9996	1.1832	0.0557687	1.20786		443.173	26.8628	444.51	6.10501	444.768	5.08708
AR23a rest	n5699@16	666.32	77.5936	51.9168	0.113633	{0.04}	44625.2	14.0109	1.22403	0.056316	1.00432		464.847	22.2518	447.744	5.74894	444.421	5.25871
AR23a rest	n5699@5	499.378	73.5324	39.2573	0.147617	{0.03}	63449.7	14.0312	1.18316	0.0571817	1.07942		498.549	23.7775	452.766	5.86728	443.8	5.07618
AR23a rest	n5699@4	345.375	51.8433	27.1633	0.152063	{0.00}	>1e6	14.0445	1.22054	0.0573712	1.29593		505.83	28.5122	453.629	6.53377	443.395	5.23201
AR23a rest	n5699@17	478.907	68.2234	37.4136	0.137617	{0.00}	>1e6	14.059	1.17793	0.0554332	1.13764		429.735	25.36	440.825	5.87302	442.952	5.04439
AR23a rest	n5699@2	356.266	51.4676	27.8568	0.144035	{0.00}	>1e6	14.0719	1.22495	0.0553941	1.37992		428.163	30.7703	440.245	6.61292	442.559	5.24138
AR23a rest	n5699@25	478.598	74.0303	37.4786	0.147175	{0.07}	28750.8	14.0738	1.19239	0.056315	1.12149		464.809	24.8483	446.119	5.92692	442.502	5.10135
AR23a rest	n5699@17b	710.84	135.375	56.2661	0.186798	{0.02}	81740.6	14.0778	1.19024	0.0561825	0.93099		459.588	20.6456	445.167	5.46077	442.381	5.09082
AR23a rest	n5699@23b	453.872	48.4018	34.9277	0.100556	{0.03}	66273.5	14.1172	1.21767	0.0550172	1.1253		412.924	25.1586	436.67	5.90147	441.186	5.19456
AR23a rest	n5699@12	586.777	62.3517	45.224	0.10549	{0.02}	103028	14.1224	1.21017	0.0555627	1.16443		434.937	25.9338	440.053	6.01495	441.032	5.16082
AR23a rest	n5699@19	506.608	57.2185	39.024	0.104673	{0.01}	198985	14.1257	1.20304	0.0554762	1.1062		431.467	24.6515	439.413	5.84614	440.931	5.12927
AR23a rest	n5699@24	425.96	63.5791	33.2018	0.149772	{0.05}	34215	14.1328	1.23524	0.0548481	1.59967		406.035	35.8101	435.187	7.1787	440.716	5.26414
AR23a rest	n5699@20	336.233	42.8676	26.0081	0.123236	{0.04}	46048.1	14.137	1.27811	0.0550678	1.35573		414.975	30.3005	436.5	6.63216	440.591	5.4454
AR23a rest	n5699@9	704.208	73.5789	54.2357	0.107489	{0.00}	>1e6	14.1394	1.1555	0.0554641	0.791204		430.979	17.6328	438.989	5.00356	440.518	4.92206
AR23a rest	n5699@6	329.261	43.7405	25.5007	0.133127	{0.00}	>1e6	14.1498	1.20142	0.0542729	1.35708		382.392	30.5044	431.048	6.38612	440.206	5.11421
AR23a rest	n5699@1	499.793	46.4697	38.279	0.0944811	{0.00}	>1e6	14.1681	1.1614	0.0556963	1.21525		440.281	27.0408	439.756	6.01732	439.656	4.9378
AR23a rest	n5699@26	393.131	65.1681	30.6894	0.16203	1.47	1270.26	14.1897	1.41084	0.057409	3.04528		507.278	67.014	450.117	12.2769	439.008	5.99028
AR23a rest	n5699@1c	603.758	86.9647	46.7627	0.13889	{0.00}	>1e6	14.1902	1.1769	0.0558116	0.996585		444.883	22.1568	439.937	5.52089	438.993	4.99644
AR23a rest	n5699@21	298.047	34.3464	22.8605	0.110298	{0.00}	>1e6	14.2138	1.20771	0.0558577	1.40757		446.717	31.2859	439.64	6.63973	438.29	5.11938
AR23a rest	n5699@13	327.467	38.4864	25.0824	0.113228	{0.00}	>1e6	14.2417	1.24201	0.0555601	1.54427		434.833	34.3962	437.04	7.06259	437.459	5.25519
AR23a rest	n5699@7	577.625	108.828	45.209	0.190486	{0.02}	83431.6	14.2492	1.263	0.0559292	0.822338		449.56	18.2676	439.208	5.38793	437.235	5.34138
AR23a rest	n5699@22b	500.261	70.903	38.5206	0.134058	{0.01}	261914	14.2523	1.26589	0.0556761	1.11172		439.476	24.7401	437.515	6.00623	437.143	5.35252
AR23a rest	n5699@18	329.395	52.8021	25.5065	0.154551	{0.06}	32042.8	14.2592	1.26507	0.0560362	1.39079		453.802	30.875	439.64	6.731	436.939	5.34666
AR23a rest	n5699@8	287.105	26.1791	21.7973	0.0964338	{0.04}	51166.9	14.2953	1.29576	0.0552423	1.48942		422.043	33.2481	433.678	6.99193	435.872	5.46345
AR23a rest	n5699@9b	462.87	67.1023	35.5775	0.146475	{0.00}	>1e6	14.3267	1.24456	0.0555421	0.9581		434.112	21.341	434.815	5.57052	434.948	5.23675
AR23a rest	n5699@26b	281.322	24.9704	20.9964	0.0858974	0.28	6704.91	14.4995	1.27882	0.0553866	1.85893		427.864	41.4577	429.609	7.93468	429.934	5.32094

## Sheet: S3 TIMS Ttn
Table S3. U-Pb TIMS data for titanite
Sample name	Nr.	Properties	Weight	U	Th/U	Pbc	Pbcom	206Pb/204Pb	207Pb/235U	2σ	206Pb/238Pb	2σ	ρ	206Pb/238U	2σ	207Pb/235U	2σ
			[µg]	[ppm]		[ppm]	[pg]			[abs]		[abs]		[Ma]	[Ma]	[Ma]	[Ma]
			(1)	(1)	(3)	(1,2)	(4)	(5)	(6)	(6)	(6)	(6)	(6)	(6)	(6)	(6)	(6)
A01	502/17	brown grain	31	92.5475	3.47538	0.738382	28.0879	459.287	0.547848	0.00819929	0.070677	0.000671375	0.687654	440.233	4.04631	443.586	5.36976
A01	502/S.65	euhedral brown grain	35	201.11	1.97892	1.7622	63.662	499.065	0.533989	0.00382318	0.0694555	0.00016268	0.402695	432.875	0.986379	434.454	2.53333
A01	502/16	euhedral brown grain	37	157.886	1.9483	1.02809	42.8594	594.478	0.533656	0.00423087	0.0692038	0.000265758	0.572204	431.357	1.60645	434.233	2.80158
A01	507/S.67	brown fragment	77	107.925	2.56649	1.32516	104.005	366.095	0.532461	0.00501037	0.0695433	0.000179057	0.334141	433.404	1.08733	433.441	3.32254
A01	507/S.69	brown fragment	67	75.8248	3.20851	0.985802	68.032	342.159	0.529474	0.00522021	0.0692934	0.000171629	0.298732	431.897	1.04329	431.46	3.46836
A01	502/18	big brown fragment	84	222.535	1.32791	1.32871	114.596	702.358	0.524149	0.00366623	0.0686558	0.000192767	0.554451	428.052	1.1667	427.919	2.44349
UL248	502/22	pale brown	17	44.8866	5.65207	3.57527	65.0324	68.3138	0.55804	0.0368583	0.0700416	0.000585356	0.268552	436.406	3.57866	450.25	23.7921
UL248	502/23	brown, round	19	73.1229	0.0528059	2.67667	55.357	124.177	0.524289	0.0137985	0.0691668	0.000267054	0.129073	431.134	1.63443	428.012	9.17465
UL248	502/24	flat, pale brown	17	27.0013	0.0798064	2.30541	43.9833	62.2895	0.538562	0.0322807	0.0692524	0.000537662	0.0844129	431.65	3.29773	437.476	21.139
(1) weight and concentrations are known to better than 10%
(2) Pbc = initial common Pb, corrected for fractionation and blank
(3) model Th/U calculated from 206Pb/208Pb ratio and age of sample
(4) Pbcom = total common Pb in sample (initial + blank)
(5) raw data corrected for fractionation
(6) corrected for fractionation, spike, blank and initial common Pb
